# Supplementary material for: Liquid phase behaviour of 1-butyl-3-methylimidazolium 2-(2-methoxyethoxy)-ethylsulfate with organic solvents and water
Source: Royal Society of Chemistry journal article supplement (doi:10.1039/b609205e), 2007-01-01
Supplement: b609205e.pdf [file b609205e.pdf]

## Supporting Information

### **Liquid phase behaviour of 1-butyl-3-methylimidazolium 2-(2-methoxyethoxy)-ethylsulfate with organic solvents and water.**

**Urszula Domańska\* and Andrzej Marciniak**

*Physical Chemistry Division, Faculty of Chemistry, Warsaw University of Technology, Noakowskiego 3, 00-664 Warsaw, Poland. E-mail: [ula@ch.pw.edu.pl](mailto:ula@ch.pw.edu.pl); Fax: +48-22-6282741; Tel: +48-22-6213115*

*Keywords:* Ionic liquids; experimental liquid-liquid equilibria; LLE; [BMIM][MDEGSO<sub>4</sub>].

---

\*Author to whom correspondence should be addressed: E-mail: [ula@ch.pw.edu.pl](mailto:ula@ch.pw.edu.pl)

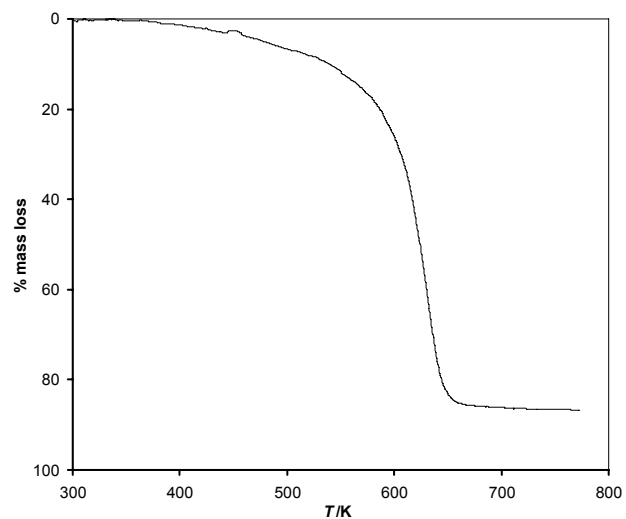

**Figure S1** TG/DTA data of [BMIM][MDEGSO<sub>4</sub>].

**Table S1** Experimental liquid-liquid equilibrium data for  $\{x_1 \text{ [BMIM][MDEGSO}_4\text{]} + (1-x_1) \text{ solvent}\}$ :  $T_b$ , temperature of binodal curve;  $T_c$ , temperature of cloud point curve

| $x_1$                          | $T_b/\text{K}$ | $T_c/\text{K}$ | $x_1$  | $T_b/\text{K}$ | $T_c/\text{K}$ |
|--------------------------------|----------------|----------------|--------|----------------|----------------|
| <i>n</i> -Hexane               |                |                |        |                |                |
| 0.9220                         | 341.95         |                | 0.9486 | 323.55         |                |
| 0.9279                         | 338.85         |                | 0.9554 | 318.35         |                |
| 0.9346                         | 334.95         |                | 0.9631 | 310.25         |                |
| 0.9413                         | 330.25         |                |        |                |                |
| Cyclohexane                    |                |                |        |                |                |
| 0.8418                         | 346.05         | 341.15         | 0.8808 | 318.75         | 312.85         |
| 0.8500                         | 340.65         | 335.25         | 0.8918 | 312.65         | 306.45         |
| 0.8607                         | 332.35         | 326.55         | 0.9054 | 303.75         | 297.45         |
| 0.8700                         | 325.25         | 319.55         |        |                |                |
| Benzene                        |                |                |        |                |                |
| 0.3555                         | 326.55         | 322.55         | 0.3786 | 314.15         | 310.45         |
| 0.3582                         | 325.65         | 321.85         | 0.3829 | 310.65         | 306.85         |
| 0.3632                         | 322.65         | 318.45         | 0.3874 | 307.15         | 303.35         |
| 0.3660                         | 321.45         | 317.55         | 0.3923 | 300.35         | 296.25         |
| 0.3731                         | 317.55         | 313.65         | 0.3969 | 293.25         | 288.85         |
| 0.3761                         | 315.75         | 311.85         |        |                |                |
| <i>tert</i> -Amyl methyl ether |                |                |        |                |                |
| 0.8349                         | 356.25         | 347.65         | 0.8729 | 328.65         | 319.35         |
| 0.8422                         | 350.05         | 342.05         | 0.8811 | 320.75         | 311.55         |
| 0.8490                         | 344.55         | 335.95         | 0.8910 | 313.35         | 304.15         |
| 0.8618                         | 336.45         | 327.35         | 0.9093 | 298.95         | 288.55         |
| Pentan-3-one                   |                |                |        |                |                |
| 0.3589                         | 363.25         | 362.75         | 0.3934 | 328.55         | 327.62         |
| 0.3700                         | 349.55         | 348.87         | 0.4063 | 320.35         | 318.65         |
| 0.3816                         | 337.65         | 336.85         | 0.4144 | 314.20         | 312.55         |
| 0.3839                         | 335.55         | 334.75         | 0.4278 | 302.27         | 299.65         |
| Nonan-5-one                    |                |                |        |                |                |
| 0.8892                         | 363.45         | 358.75         | 0.9161 | 323.25         | 318.55         |

| $x_1$          | $T_b/K$ | $T_c/K$ | $x_1$  | $T_b/K$ | $T_c/K$ |
|----------------|---------|---------|--------|---------|---------|
| 0.8970         | 354.85  | 349.95  | 0.9179 | 319.35  | 314.35  |
| 0.9026         | 347.05  | 342.25  | 0.9219 | 310.80  | 305.95  |
| 0.9096         | 335.75  | 331.05  | 0.9271 | 298.95  | 294.35  |
| 0.9122         | 330.25  | 325.55  |        |         |         |
| Cyclopentanone |         |         |        |         |         |
| 0.0230         | 349.30  | 348.25  | 0.0381 | 307.90  | 306.95  |
| 0.0257         | 338.45  | 337.35  | 0.0396 | 305.25  | 304.30  |
| 0.0278         | 332.95  | 332.10  | 0.0410 | 302.25  | 301.20  |
| 0.0319         | 322.85  | 321.95  | 0.0417 | 300.60  | 299.84  |
| 0.0338         | 317.90  | 316.85  | 0.0426 | 298.45  | 297.50  |
| 0.0346         | 316.20  | 315.15  | 0.0435 | 296.25  | 295.20  |
| 0.0359         | 313.25  | 312.15  | 0.0453 | 293.05  | 291.95  |
| 0.0363         | 311.75  | 310.65  |        |         |         |
| Water          |         |         |        |         |         |
| 0.0331         | 371.25  |         | 0.0760 | 348.65  |         |
| 0.0379         | 369.05  |         | 0.0864 | 342.85  |         |
| 0.0433         | 365.95  |         | 0.0951 | 335.85  |         |
| 0.0500         | 362.45  |         | 0.1033 | 324.15  |         |
| 0.0634         | 355.95  |         | 0.1081 | 303.45  |         |
